# Supplementary material
Source: Springer Nature journal article supplement (https://www.springermedizin.de/resource/supplementary/12891_2009_814_MOESM1_ESM.pdf/9507080)
Supplement: MOESM1 [file 9507080]

Number of AEs resulting in discontinuation

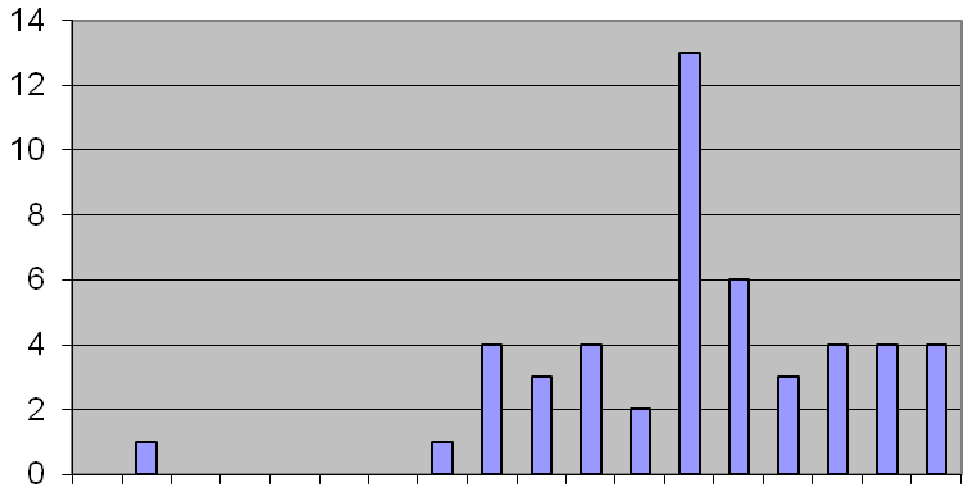

July03-Oct03  
Oct03-Jan04  
Jan04-Apr04  
Apr04-July04  
July04-Oct04  
Oct04-Jan05  
Jan05-Apr05  
Apr05-July05  
July05-Oct05  
Oct05-Jan06  
Jan06-Apr06  
Apr06-July06  
July06-Oct06  
Oct06-Jan07  
Jan07-Apr07  
Apr07-July07  
July07-Oct07  
Oct07-Jan08
